28. Calindo A: Hepatic circulation and hepatic function during anesthesia and surgery. II. The effect of various anesthetic agents. *Canad Anaesth Soc J* 12:337-348, 1965
29. Calindo A, Brindle GF, Gilbert RCB: Hepatic circulation and hepatic function during anesthesia and surgery. IV. Halothane anesthesia. *Canad Anaesth Soc J* 13:328-341, 1966
30. Westermarck L: Haemodynamics during halothane anesthesia in the cat. *Acta Anaesth Scand* 35 suppl:20-25, 1969
31. Lindgren P, Westermarck L, Wahlen A: Blood circulation in skeletal muscles under halothane anesthesia in the cat. *Acta Anaesth Scand* 9:83-97, 1965
32. Ngai SH, Bolme P: Effects of anesthetics on circulatory mechanisms in the dog. *J Pharmacol Exp Ther* 153:495-504, 1966
33. Akster JM, Brody MJ: Mechanism of vascular resistance changes produced in skin and muscle by halothane. *J Pharmacol Exp Ther* 170:287-293, 1969
34. Cristoforo MD, Brody MJ: Non-adrenergic vasoconstriction produced by halothane and cyclopropane anesthesia. *ANESTHESIOLOGY* 29:44-56, 1968
35. Black GW, McArdle L: The effects of halothane on the peripheral circulation in man. *Brit J Anaesth* 34:2-10, 1962
36. Pauca A, Sykes MK: Upper limb blood-flow during thiopentone-halothane anesthesia. *Brit J Anaesth* 39:758-765, 1967
37. Silber AP: Blood flow through lung and skeletal muscle in connection with anesthesia and controlled respiration. *Acta Anaesth Scand* 23 suppl:657-662, 1966
38. Litarczek C, Ionescu T, Litarczek D, *et al.*: Haemodynamic changes in the pulmonary and renal circulation during halothane and methoxyflurane anesthesia. *Acta Anaesth Scand* 23:643-648, 1966

### Obstetrics

**HYDRALAZINE, MATERNAL BLOOD PRESSURE AND FETAL CIRCULATION** Hydralazine (Apresoline) is used therapeutically in toxemia of pregnancy to lower arterial blood pressure. The hypotensive effect has been reported to be associated with increases in cardiac output and in renal, cephalic, femoral, and splanchnic blood flows. The effects on uteroplacental and fetal circulations of hydralazine injected either into the mother or into the fetus or the neonate were investigated in near-term normotensive pregnant sheep. Intravenous doses of 0.2-0.5 mg/kg given to the mother decreased maternal arterial pressure and uterine blood flow to equivalent degrees; uterine vascular resistance did not change. Although fetal cardiovascular function was not appreciably affected, fetal blood  $P_{O_2}$  decreased significantly in the face of no change in maternal arterial  $P_{O_2}$ . When injected directly into the fetal circulation, hydralazine reduced fetal arterial pressure only after the administration of a dose 10 to 15 times that given to the mother; no alterations occurred in the fetal blood flow measured in the ascending aorta, the ductus, or the main pulmonary artery; fetal blood gases and pH remained unchanged. The lack of responsiveness of the fetus at term to direct administration of hydralazine suggests that the receptors acted upon by this drug may be incompletely developed (at least in the sheep) or that the magnitude of the placental circulation (a low-resistance system which contains the major portion of fetal blood volume) masks the magnitude of the vascular response within the fetus proper. Evidence for this is suggested by the fact that injection of hydralazine into the fetal circulation after the cord is clamped does produce a modest, albeit measurable, rise in blood pressure. (Larner, C. N., Weston, P. V., Brinkman, C. R., III, and Assali, N. S.: *Effects of Hydralazine on Uteroplacental and Fetal Circulation*, *Amer. J. Obstet Gynec.* 108: 375-381 (Oct.) 1970.) **EDITOR'S COMMENT:** This represents a valuable study toward a fundamental understanding of differences between the responses of maternal and fetal circulations to hypotensive drugs. Caution must be exercised when transferring these data obtained in normotensive animals to the hypertensive pregnant subject. The authors do indicate that such studies in hypertensive animals and patients are presently under way. We look forward to these data with great interest.
